# Supplementary material for: Exercise as medicine—the use of group medical visits to promote physical activity and treat chronic moderate depression: a preliminary 14-week pre–post study
Source: PubMed Central journal article supplement — BMJ Open Sport Exerc Med. 2015 Nov 2;1(1):e000036. doi: 10.1136/bmjsem-2015-000036 (PMC5117054; doi:10.1136/bmjsem-2015-000036), 2015-11-02
Supplement: supp_1.1.e000036_bmjsem-2015-000036supp.pdf [file supp_1.1.e000036_bmjsem-2015-000036supp.pdf]

## **APPENDIX 'A'**

### **Our 'Refrain' of The Health Benefits of Regular Exercise:**

1. Reduced risk of heart disease, high blood pressure, diabetes (risk is 30% less)
2. Reduced risk of colon cancer (40% less risk)
3. Less chance of colds, flus
4. Increased bone density, increased joint flexibility
5. Better weight control
6. More energy
7. Brighter mental outlook
8. Increased self esteem
9. Less risk of anxiety, depression

..... and.....regular exercise should be FUN!!
